# Supplementary material
Source: bioRxiv or medRxiv preprint supplement (https://www.medrxiv.org/highwire/filestream/73286/field_highwire_adjunct_files/4/2020.03.05.20031500-5.pdf)
Supplement: Supplementary file [file 2020.03.05.20031500-5.pdf]

**Table S2.** 5T4- and MVA-specific antibody responses in plasma of vaccinated patients.

| <b>Patient ID</b> | <b>Group</b> | <b>Timepoint (week)</b> | <b>5T4 antibody (RU)</b> | <b>Response</b> | <b>MVA antibody (RU)</b> | <b>Response</b> |
|-------------------|--------------|-------------------------|--------------------------|-----------------|--------------------------|-----------------|
| VAN-001           | 4            | 0                       | 27.23                    | N/A             | 7.39                     | N/A             |
| VAN-001           |              | 2                       | 29.05                    | Negative        | 10.15                    | Negative        |
| VAN-001           |              | 4                       | 25.01                    | Negative        | 13.03                    | Positive        |
| VAN-001           |              | 5                       | 51.88                    | Positive        | 125.99                   | Positive        |
| VAN-001           |              | 8                       | 44.90                    | Positive        | 116.84                   | Positive        |
| VAN-001           |              | 9                       | 48.14                    | Positive        | 125.77                   | Positive        |
| VAN-001           |              | 12                      | 47.41                    | Positive        | 108.15                   | Positive        |
| VAN-001           |              | 24                      | 35.21                    | Negative        | 52.70                    | Positive        |
| VAN-002           | 3            | 0                       | 20.33                    | N/A             | 8.56                     | N/A             |
| VAN-002           |              | 2                       | 17.91                    | Negative        | 65.44                    | Positive        |
| VAN-002           |              | 4                       | 25.12                    | Negative        | 57.50                    | Positive        |
| VAN-002           |              | 5                       | 37.28                    | Positive        | 70.88                    | Positive        |
| VAN-002           |              | 8                       | 36.18                    | Positive        | 64.30                    | Positive        |
| VAN-002           |              | 9                       | 30.35                    | Negative        | 50.63                    | Positive        |
| VAN-002           |              | 12                      | 29.31                    | Negative        | 43.20                    | Positive        |
| VAN-002           |              | 24                      | 14.09                    | Negative        | 34.55                    | Positive        |
| VAN-003           | 2            | 0                       | 19.22                    | N/A             | 5.22                     | N/A             |
| VAN-003           |              | 2                       | 30.90                    | Positive        | 8.23                     | Negative        |
| VAN-003           |              | 4                       | 31.77                    | Positive        | 8.53                     | Negative        |
| VAN-003           |              | 5                       | 32.10                    | Positive        | 42.79                    | Positive        |
| VAN-003           |              | 8                       | 25.89                    | Negative        | 72.23                    | Positive        |
| VAN-003           |              | 9                       | 30.14                    | Positive        | 79.45                    | Positive        |
| VAN-003           |              | 12                      | 47.49                    | Positive        | 79.91                    | Positive        |
| VAN-003           |              | 24                      | 24.22                    | Negative        | 55.76                    | Positive        |
| VAN-004           | 1            | 0                       | 43.21                    | N/A             | 6.48                     | N/A             |
| VAN-004           |              | 2                       | 44.39                    | Negative        | 6.23                     | Negative        |
| VAN-004           |              | 4                       | 48.02                    | Negative        | 9.23                     | Negative        |
| VAN-004           |              | 5                       | 46.49                    | Negative        | 27.11                    | Positive        |
| VAN-004           |              | 8                       | 48.14                    | Negative        | 62.50                    | Positive        |
| VAN-004           |              | 9                       | 85.00                    | Positive        | 98.95                    | Positive        |
| VAN-004           |              | 12                      | 81.46                    | Positive        | 71.63                    | Positive        |
| VAN-004           |              | 24                      | 35.25                    | Negative        | 40.24                    | Positive        |
| VAN-005           | 6            | 0                       | 28.52                    | N/A             | 11.70                    | N/A             |
| VAN-005           |              | 1                       | 28.94                    | Negative        | 10.23                    | Negative        |

|         |   |    |        |          |        |          |
|---------|---|----|--------|----------|--------|----------|
| VAN-005 |   | 2  | 40.82  | Negative | 70.87  | Positive |
| VAN-005 |   | 4  | 42.11  | Negative | 223.65 | Positive |
| VAN-005 |   | 17 | 61.56  | Positive | 122.79 | Positive |
| VAN-006 | 8 | 0  | 22.20  | N/A      | <5     | N/A      |
| VAN-006 |   | 1  | 18.85  | Negative | <5     | Negative |
| VAN-006 |   | 2  | 20.27  | Negative | <5     | Negative |
| VAN-006 |   | 4  | 23.84  | Negative | 11.77  | Positive |
| VAN-006 |   | 8  | 22.89  | Negative | 9.25   | Positive |
| VAN-006 |   | 10 | 22.61  | Negative | 8.62   | Negative |
| VAN-006 |   | 22 | 19.99  | Negative | 5.06   | Negative |
| VAN-006 |   | 34 | 19.03  | Negative | <5     | Negative |
| VAN-006 |   | 48 | 34.31  | Negative | <5     | Negative |
| VAN-007 | 7 | 0  | 12.80  | N/A      | <5     | N/A      |
| VAN-007 |   | 1  | 12.80  | Negative | <5     | Negative |
| VAN-007 |   | 2  | 14.14  | Negative | 10.67  | Positive |
| VAN-007 |   | 4  | 38.19  | Positive | 24.90  | Positive |
| VAN-007 |   | 8  | 40.57  | Positive | 18.39  | Positive |
| VAN-007 |   | 10 | 38.46  | Positive | 14.81  | Positive |
| VAN-007 |   | 22 | 19.95  | Positive | 12.53  | Positive |
| VAN-007 |   | 34 | 13.98  | Negative | 8.75   | Negative |
| VAN-007 |   | 48 | 14.21  | Negative | 7.26   | Negative |
| VAN-008 | 2 | 0  | 30.16  | N/A      | 8.13   | N/A      |
| VAN-008 |   | 2  | 27.19  | Negative | 9.94   | Negative |
| VAN-008 |   | 4  | 27.63  | Negative | 9.48   | Negative |
| VAN-008 |   | 5  | 30.81  | Negative | 8.51   | Negative |
| VAN-008 |   | 8  | 91.41  | Positive | 31.50  | Positive |
| VAN-008 |   | 9  | 357.00 | Positive | 127.25 | Positive |
| VAN-008 |   | 12 | 273.81 | Positive | 98.64  | Positive |
| VAN-008 |   | 24 | 79.14  | Positive | 27.22  | Positive |
| VAN-010 | 6 | 0  | 18.39  | N/A      | 9.10   | N/A      |
| VAN-010 |   | 1  | 19.16  | Negative | 5.58   | Negative |
| VAN-010 |   | 2  | 19.59  | Negative | 17.62  | Positive |
| VAN-010 |   | 4  | 20.26  | Negative | 28.82  | Positive |
| VAN-010 |   | 16 | 31.07  | Positive | 47.25  | Positive |
| VAN-011 | 3 | 0  | 26.85  | N/A      | <5     | N/A      |
| VAN-011 |   | 2  | 27.39  | Negative | 70.36  | Positive |
| VAN-011 |   | 4  | 36.81  | Negative | 61.80  | Positive |
| VAN-011 |   | 5  | 143.44 | Positive | 46.99  | Positive |

|         |   |    |        |          |        |          |
|---------|---|----|--------|----------|--------|----------|
| VAN-011 |   | 8  | 136.85 | Positive | 89.78  | Positive |
| VAN-011 |   | 9  | 175.45 | Positive | 95.62  | Positive |
| VAN-011 |   | 12 | 164.23 | Positive | 133.75 | Positive |
| VAN-011 |   | 24 | 64.25  | Positive | 76.67  | Positive |
| VAN-012 | 5 | 0  | 14.61  | N/A      | <5     | N/A      |
| VAN-012 |   | 1  | 14.91  | Negative | <5     | Negative |
| VAN-012 |   | 2  | 16.23  | Negative | 9.32   | Positive |
| VAN-012 |   | 4  | 18.09  | Negative | 105.44 | Positive |
| VAN-012 |   | 16 | 22.49  | Positive | 35.44  | Positive |
| VAN-013 | 7 | 0  | 47.48  | N/A      | <5     | Negative |
| VAN-013 |   | 1  | 45.04  | Negative | <5     | N/A      |
| VAN-013 |   | 2  | 44.96  | Negative | <5     | Negative |
| VAN-013 |   | 4  | 45.70  | Negative | 10.09  | Positive |
| VAN-013 |   | 8  | 48.87  | Negative | 10.99  | Positive |
| VAN-013 |   | 22 | 60.93  | Negative | 7.35   | Negative |
| VAN-013 |   | 34 | 47.65  | Negative | 5.49   | Negative |
| VAN-013 |   | 48 | 52.92  | Negative | 5.60   | Negative |
| VAN-015 | 8 | 0  | 14.84  | N/A      | 7.01   | Negative |
| VAN-015 |   | 1  | 14.76  | Negative | 7.86   | Negative |
| VAN-015 |   | 2  | 14.65  | Negative | 35.01  | Positive |
| VAN-015 |   | 4  | 19.88  | Negative | 161.63 | Positive |
| VAN-015 |   | 8  | 28.73  | Positive | 103.58 | Positive |
| VAN-015 |   | 22 | 18.86  | Negative | 78.50  | Positive |
| VAN-015 |   | 34 | 16.08  | Negative | 68.74  | Positive |
| VAN-015 |   | 48 | 18.36  | Negative | 53.43  | Positive |
| VAN-016 | 8 | 0  | 5.78   | N/A      | <5     | N/A      |
| VAN-016 |   | 1  | 5.78   | Negative | <5     | Negative |
| VAN-016 |   | 2  | 6.38   | Negative | 28.77  | Positive |
| VAN-016 |   | 4  | 11.74  | Positive | 171.66 | Positive |
| VAN-016 |   | 8  | 19.72  | Positive | 194.35 | Positive |
| VAN-016 |   | 22 | 12.68  | Positive | 135.41 | Positive |
| VAN-016 |   | 34 | 8.81   | Negative | 107.05 | Positive |
| VAN-016 |   | 48 | 8.09   | Negative | 83.54  | Positive |
| VAN-018 | 8 | 0  | 10.67  | Negative | <5     | Negative |
| VAN-018 |   | 1  | 11.36  | Negative | <5     | Negative |
| VAN-018 |   | 2  | 12.81  | Negative | <5     | Negative |
| VAN-018 |   | 4  | 11.17  | Negative | <5     | Negative |
| VAN-018 |   | 8  | 13.40  | Negative | <5     | Negative |

|         |   |    |       |          |        |          |
|---------|---|----|-------|----------|--------|----------|
| VAN-018 |   | 22 | 20.73 | Positive | <5     | Negative |
| VAN-018 |   | 34 | 19.22 | Positive | <5     | Negative |
| VAN-018 |   | 48 | 34.63 | Positive | <5     | Negative |
| VAN-019 | 8 | 0  | 31.63 | N/A      | 18.54  | N/A      |
| VAN-019 |   | 1  | 30.82 | Negative | 18.51  | Negative |
| VAN-019 |   | 2  | 32.06 | Negative | 50.55  | Positive |
| VAN-019 |   | 4  | 31.12 | Negative | 278.87 | Positive |
| VAN-019 |   | 8  | 37.88 | Negative | 273.53 | Positive |
| VAN-019 |   | 22 | 39.16 | Negative | 148.04 | Positive |
| VAN-019 |   | 34 | 33.41 | Negative | 101.59 | Positive |
| VAN-019 |   | 48 | 24.70 | Negative | 104.30 | Positive |
| VAN-020 | 7 | 0  | 19.56 | N/A      | <5     | Negative |
| VAN-020 |   | 1  | 21.48 | Negative | <5     | Negative |
| VAN-020 |   | 2  | 22.33 | Negative | 24.82  | Positive |
| VAN-020 |   | 4  | 22.52 | Negative | 148.16 | Positive |
| VAN-020 |   | 8  | 26.59 | Negative | 87.96  | Positive |
| VAN-020 |   | 22 | 28.17 | Negative | 41.68  | Positive |
| VAN-020 |   | 34 | 29.76 | Negative | 34.89  | Positive |
| VAN-020 |   | 48 | 29.10 | Negative | 30.19  | Positive |
| VAN-021 | 7 | 0  | 23.26 | N/A      | 5.18   | N/A      |
| VAN-021 |   | 1  | 25.60 | Negative | 5.02   | Negative |
| VAN-021 |   | 2  | 21.05 | Negative | 6.53   | Negative |
| VAN-021 |   | 4  | 24.79 | Negative | 9.14   | Positive |
| VAN-021 |   | 8  | 26.19 | Negative | 7.01   | Negative |
| VAN-021 |   | 22 | 26.41 | Negative | 7.23   | Negative |
| VAN-021 |   | 34 | 25.84 | Negative | 7.09   | Negative |
| VAN-021 |   | 48 | 30.55 | Negative | <5     | Negative |
| VAN-022 | 8 | 0  | 60.50 | N/A      | 25.25  | N/A      |
| VAN-022 |   | 1  | 56.15 | Negative | 22.57  | Negative |
| VAN-022 |   | 2  | 60.83 | Negative | 115.22 | Positive |
| VAN-022 |   | 4  | 63.04 | Negative | 481.99 | Positive |
| VAN-022 |   | 8  | 66.52 | Negative | 367.45 | Positive |
| VAN-022 |   | 22 | 59.50 | Negative | 229.51 | Positive |
| VAN-022 |   | 34 | 58.68 | Negative | 198.55 | Positive |
| VAN-022 |   | 48 | 81.67 | Negative | 155.49 | Positive |
| VAN-023 | 2 | 0  | 16.15 | N/A      | <5     | N/A      |
| VAN-023 |   | 2  | 16.41 | Negative | <5     | Negative |
| VAN-023 |   | 4  | 15.68 | Negative | <5     | Negative |

|         |   |    |        |          |        |          |
|---------|---|----|--------|----------|--------|----------|
| VAN-023 |   | 5  | 18.16  | Negative | <5     | Negative |
| VAN-023 |   | 8  | 29.90  | Positive | 73.92  | Positive |
| VAN-023 |   | 9  | 153.87 | Positive | 84.42  | Positive |
| VAN-023 |   | 12 | 89.75  | Positive | 80.31  | Positive |
| VAN-023 |   | 24 | 27.82  | Positive | 51.90  | Positive |
| VAN-024 | 7 | 0  | 12.59  | N/A      | 5.58   | N/A      |
| VAN-024 |   | 1  | 12.96  | Negative | 5.60   | Negative |
| VAN-024 |   | 2  | 19.30  | Negative | 7.93   | Negative |
| VAN-024 |   | 4  | 24.94  | Positive | 52.00  | Positive |
| VAN-024 |   | 8  | 22.15  | Positive | 40.49  | Positive |
| VAN-024 |   | 22 | 17.08  | Negative | 24.59  | Positive |
| VAN-024 |   | 34 | 27.41  | Positive | 21.69  | Positive |
| VAN-024 |   | 48 | 35.62  | Positive | 17.68  | Positive |
| VAN-026 | 7 | 0  | 15.22  | N/A      | <5     | N/A      |
| VAN-026 |   | 1  | 16.86  | Negative | <5     | Negative |
| VAN-026 |   | 2  | 17.69  | Negative | 12.81  | Positive |
| VAN-026 |   | 4  | 20.62  | Negative | 89.02  | Positive |
| VAN-026 |   | 8  | 22.80  | Negative | 61.33  | Positive |
| VAN-026 |   | 22 | 16.04  | Negative | 29.47  | Positive |
| VAN-026 |   | 34 | 19.13  | Negative | 27.18  | Positive |
| VAN-026 |   | 48 | 22.12  | Negative | 22.00  | Positive |
| VAN-029 | 5 | 0  | 47.84  | N/A      | <5     | N/A      |
| 0011029 |   | 1  | 43.48  | Negative | <5     | Negative |
| 0011029 |   | 2  | 44.78  | Negative | <5     | Negative |
| 0011029 |   | 4  | 45.29  | Negative | 6.77   | Negative |
| 0011029 |   | 16 | 50.59  | Negative | <5     | Negative |
| VAN-031 | 4 | 0  | 18.18  | N/A      | 9.57   | N/A      |
| VAN-031 |   | 2  | 18.69  | Negative | 48.68  | Positive |
| VAN-031 |   | 4  | 22.37  | Negative | 40.62  | Positive |
| VAN-031 |   | 5  | 129.69 | Positive | 99.15  | Positive |
| VAN-031 |   | 8  | 135.30 | Positive | 168.39 | Positive |
| VAN-031 |   | 9  | 139.82 | Positive | 175.58 | Positive |
| VAN-031 |   | 12 | 164.86 | Positive | 182.18 | Positive |
| VAN-031 |   | 24 | 190.61 | Positive | 128.02 | Positive |
| VAN-034 | 6 | 0  | 12.92  | N/A      | 18.21  | Negative |
| VAN-034 |   | 1  | 12.37  | Negative | 19.42  | Negative |
| VAN-034 |   | 2  | 14.52  | Negative | 33.10  | Positive |
| VAN-034 |   | 4  | 14.45  | Negative | 99.26  | Positive |

|         |   |    |        |          |        |          |
|---------|---|----|--------|----------|--------|----------|
| VAN-034 |   | 16 | 17.09  | Negative | 67.78  | Positive |
| VAN-801 | 5 | 0  | 20.14  | N/A      | <5     | N/A      |
| VAN-801 |   | 1  | 20.88  | Negative | <5     | Negative |
| VAN-801 |   | 2  | 21.07  | Negative | <5     | Negative |
| VAN-801 |   | 4  | 26.59  | Negative | 24.94  | Positive |
| VAN-801 |   | 16 | 27.37  | Negative | 11.68  | Positive |
| VAN-802 | 5 | 0  | 10.56  | N/A      | <5     | N/A      |
| VAN-802 |   | 1  | 10.88  | Negative | <5     | Negative |
| VAN-802 |   | 2  | 12.56  | Negative | <5     | Negative |
| VAN-802 |   | 4  | 15.93  | Negative | 43.80  | Positive |
| VAN-802 |   | 16 | 13.62  | Negative | 9.77   | Positive |
| VAN-803 | 3 | 0  | 16.22  | N/A      | 8.65   | N/A      |
| VAN-803 |   | 1  | 17.27  | Negative | 8.81   | Negative |
| VAN-803 |   | 2  | 47.15  | Positive | 15.63  | Positive |
| VAN-803 |   | 4  | 38.14  | Positive | 178.03 | Positive |
| VAN-803 |   | 16 | 35.89  | Positive | 159.01 | Positive |
| VAN-804 | 3 | 0  | 19.52  | N/A      | <5     | N/A      |
| VAN-804 |   | 2  | 17.66  | Negative | <5     | Negative |
| VAN-804 |   | 4  | 19.39  | Negative | <5     | Negative |
| VAN-804 |   | 5  | 172.93 | Positive | 114.02 | Positive |
| VAN-804 |   | 8  | 101.07 | Positive | 67.67  | Positive |
| VAN-804 |   | 9  | 129.44 | Positive | 60.26  | Positive |
| VAN-804 |   | 12 | 79.42  | Positive | 60.00  | Positive |
| VAN-804 |   | 16 | 28.90  | Negative | 15.35  | Positive |
| VAN-805 | 6 | 0  | 20.38  | N/A      | 6.10   | N/A      |
| VAN-805 |   | 1  | 54.37  | Positive | 6.25   | Negative |
| VAN-805 |   | 2  | 79.83  | Positive | 7.62   | Negative |
| VAN-805 |   | 4  | 52.94  | Positive | 45.27  | Positive |
| VAN-805 |   | 16 | 48.85  | Positive | 17.45  | Positive |
| VAN-806 | 5 | 0  | 28.86  | N/A      | 23.80  | N/A      |
| VAN-806 |   | 1  | 27.11  | Negative | 21.90  | Negative |
| VAN-806 |   | 2  | 26.30  | Negative | 26.20  | Negative |
| VAN-806 |   | 4  | 27.70  | Negative | 43.41  | Positive |
| VAN-806 |   | 16 | 38.27  | Negative | 28.14  | Negative |
| VAN-807 | 3 | 0  | 21.23  | N/A      | 14.61  | N/A      |
| VAN-807 |   | 2  | 25.78  | Negative | 566.83 | Positive |
| VAN-807 |   | 4  | 29.56  | Negative | 371.77 | Positive |
| VAN-807 |   | 5  | 53.98  | Positive | 323.16 | Positive |

|         |   |    |        |          |        |          |
|---------|---|----|--------|----------|--------|----------|
| VAN-807 |   | 8  | 49.21  | Positive | 228.06 | Positive |
| VAN-807 |   | 9  | 59.70  | Positive | 234.70 | Positive |
| VAN-807 |   | 12 | 56.67  | Positive | 194.89 | Positive |
| VAN-807 |   | 24 | 30.49  | Negative | 119.19 | Positive |
| VAN-808 | 6 | 0  | 13.35  | N/A      | <5     | N/A      |
| VAN-808 |   | 1  | 13.78  | Negative | <5     | Negative |
| VAN-808 |   | 2  | 16.92  | Negative | 146.12 | Positive |
| VAN-808 |   | 4  | 18.51  | Negative | 176.13 | Positive |
| VAN-808 |   | 16 | 15.70  | Negative | 70.89  | Positive |
| VAN-809 | 5 | 0  | 12.51  | N/A      | <5     | N/A      |
| VAN-809 |   | 1  | 12.51  | Negative | <5     | Negative |
| VAN-809 |   | 2  | 15.01  | Negative | 45.41  | Positive |
| VAN-809 |   | 16 | 15.26  | Negative | 152.17 | Positive |
| VAN-810 | 5 | 0  | 17.89  | N/A      | 13.71  | N/A      |
| VAN-810 |   | 1  | 75.86  | Positive | 14.13  | Negative |
| VAN-810 |   | 2  | 126.60 | Positive | 45.36  | Positive |
| VAN-810 |   | 4  | 114.48 | Positive | 166.36 | Positive |
| VAN-811 | 1 | 0  | 6.26   | N/A      | <5     | N/A      |
| VAN-811 |   | 2  | 6.53   | Negative | <5     | Negative |
| VAN-811 |   | 4  | 6.71   | Negative | <5     | Negative |
| VAN-811 |   | 5  | 6.93   | Negative | <5     | Negative |
| VAN-811 |   | 8  | 6.79   | Negative | <5     | Negative |
| VAN-811 |   | 9  | 8.30   | Negative | 6.64   | Negative |
| VAN-811 |   | 12 | 7.64   | Negative | 5.02   | Negative |
| VAN-811 |   | 24 | 10.47  | Positive | <5     | Negative |
| VAN-812 | 5 | 0  | 16.65  | N/A      | 5.48   | N/A      |
| VAN-812 |   | 1  | 17.37  | Negative | 5.76   | Negative |
| VAN-812 |   | 2  | 19.16  | Negative | 24.14  | Positive |
| VAN-812 |   | 4  | 17.27  | Negative | 56.34  | Positive |
| VAN-812 |   | 16 | 42.10  | Positive | 28.76  | Positive |
| VAN-813 | 6 | 0  | 34.15  | N/A      | <5     | N/A      |
| VAN-813 |   | 1  | 34.33  | Negative | <5     | Negative |
| VAN-813 |   | 2  | 37.25  | Negative | <5     | Negative |
| VAN-813 |   | 4  | 63.52  | Positive | 28.08  | Positive |
| VAN-813 |   | 16 | 54.13  | Positive | 9.78   | Positive |
| VAN-814 | 6 | 0  | 24.24  | N/A      | <5     | N/A      |
| VAN-814 |   | 1  | 29.41  | Negative | <5     | Negative |
| VAN-814 |   | 2  | 29.78  | Negative | <5     | Negative |

|                |  |           |       |          |       |          |
|----------------|--|-----------|-------|----------|-------|----------|
| <b>VAN-814</b> |  | <b>4</b>  | 29.22 | Negative | 11.03 | Positive |
| <b>VAN-814</b> |  | <b>16</b> | 29.42 | Negative | 6.18  | Negative |
